# Supplementary material for: Cooperative structure-directing effect in the synthesis of aluminophosphate molecular sieves in ionic liquids
Source: Royal Society of Chemistry journal article supplement (doi:10.1039/b920232n), 2010-01-01
Supplement: b920232n.pdf [file b920232n.pdf]

## Supplementary Information

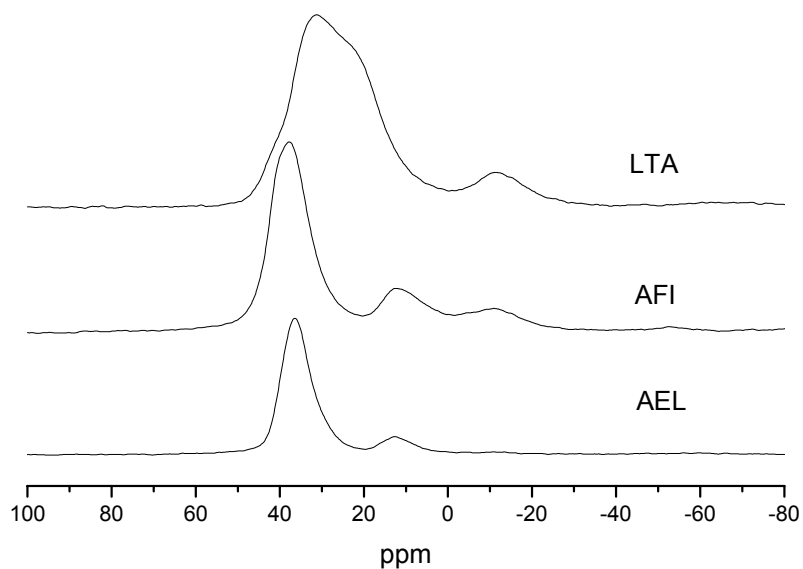

**Figure S1**  $^{27}\text{Al}$  MAS NMR spectra of the pure phased AEL, AFI and LTA structures

$^{27}\text{Al}$  MAS NMR spectra unambiguously indicate that the Al species in the solid products are tetrahedral, penta-coordinated and octahedral Al, and most of them are framework Al species.<sup>1-3</sup>

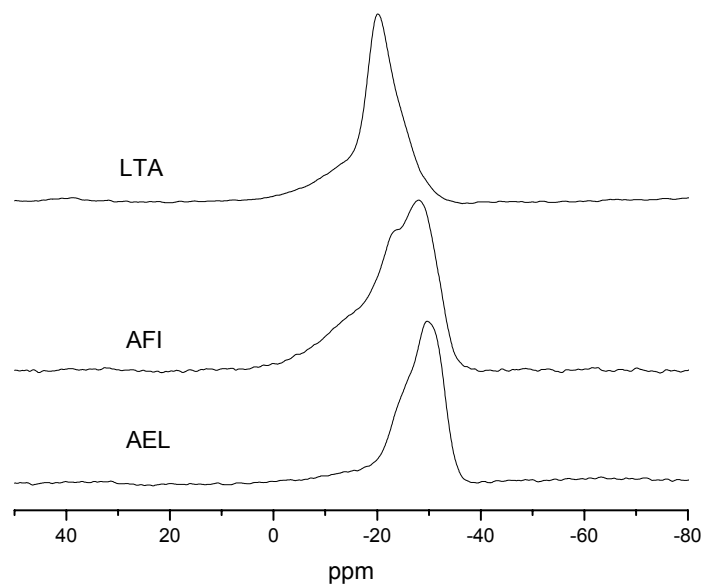

**Figure S2**  $^{31}\text{P}$  MAS NMR spectra of the pure phased AEL, AFI and LTA structures.

The signals at -22 and -29 ppm in the  $^{31}\text{P}$  MAS NMR spectra can be ascribed to the fully condensed *P i.e.* framework P species in the solid products.<sup>1-3</sup>

### References

- 1 F. Taulelle, M. Pruski, J. P. Amoureux, D. Lang, A. Bailly, C. Huguenard, M. Haouas, C. Gerardin, T. Loiseau and G. Ferey, *J. Am. Chem. Soc.* 1999, **121**, 12148.
- 2 Y. N. Huang, R. Richer and C. W. Kirby, *J. Phy. Chem. B*, 2003, **107**, 1326.
- 3 J. Xu, L. Chen, D. L. Zeng, J. Yang, M. J. Zhang, C. H. Ye and F. Deng, *J. Phy. Chem. B*, 2007, **111**, 7105.
